# Supplementary material for: Green synthesis of carbon dots and their applications
Source: PubMed Central journal article supplement — RSC Adv. 2021 Jul 21;11(41):25354–63. doi: 10.1039/d1ra04718c (PMC9037072; doi:10.1039/d1ra04718c), 2021-07-21
Supplement: RA-011-D1RA04718C-s001.pdf [file RA-011-D1RA04718C-s001.pdf]

# Electronic supplementary information

## Green synthesis of carbon dots and their applications

Shawninder Chahal,<sup>a</sup> Jun-Ray Macairan,<sup>b</sup> Nariman Yousefi,<sup>c</sup>

Nathalie Tufenkji,<sup>a,d</sup> Rafik Naccache<sup>b,d\*</sup>

<sup>a</sup> Department of Chemical Engineering, McGill University, 3610 University St, Montreal, Quebec H3A 0C5, Canada

<sup>b</sup> Department of Chemistry and Biochemistry and the Centre for NanoScience Research, Concordia University, 7141 Sherbrooke St. West, Montreal, Quebec H4B 1R6, Canada

<sup>c</sup> Department of Chemical Engineering, Ryerson University, 350 Victoria St, Toronto, Ontario M5B 2K3, Canada

<sup>d</sup> Quebec Centre for Advanced Materials

\*Corresponding Author. Phone: (514) 848-2424 ext 3279; E-mail: rafik.naccache@concordia.ca

Table S1. References for images in Figure 1. All images are in the public domain.

| Image                     | Source                                                                                                                                                  |
|---------------------------|---------------------------------------------------------------------------------------------------------------------------------------------------------|
| walnut                    | <a href="https://commons.wikimedia.org/wiki/File:Walnuts_no_shell.jpg">https://commons.wikimedia.org/wiki/File:Walnuts_no_shell.jpg</a>                 |
| tulsi                     | <a href="https://commons.wikimedia.org/wiki/File:Basil-raihan.jpg">https://commons.wikimedia.org/wiki/File:Basil-raihan.jpg</a>                         |
| ginkgo                    | <a href="https://commons.wikimedia.org/wiki/File:GinkgoSaplings.jpg">https://commons.wikimedia.org/wiki/File:GinkgoSaplings.jpg</a>                     |
| prickly pear              | <a href="https://commons.wikimedia.org/wiki/File:Prickly_Pear_Closeup.jpg">https://commons.wikimedia.org/wiki/File:Prickly_Pear_Closeup.jpg</a>         |
| <i>Eleusine coracana</i>  | <a href="https://commons.wikimedia.org/wiki/File:Finger_millet_3_11-21-02.jpg">https://commons.wikimedia.org/wiki/File:Finger_millet_3_11-21-02.jpg</a> |
| <i>Prosopis juliflora</i> | <a href="https://commons.wikimedia.org/wiki/File:Prosopis_juliflora.jpg">https://commons.wikimedia.org/wiki/File:Prosopis_juliflora.jpg</a>             |
| <i>Eleocharis dulcis</i>  | <a href="https://commons.wikimedia.org/wiki/File:Wasserkastanien.jpg">https://commons.wikimedia.org/wiki/File:Wasserkastanien.jpg</a>                   |

Table S2. References for data shown in Figures 1b, 2d, 2e, 2f, 3f.

| Carbon source                | Reagents type    | Reaction medium | Synthesis conditions | Synthesis method | Filtration | Centrifugation | Dialysis | Size [nm] | N:C   | O:C   | Excitation [nm] | Emission [nm] | QY [%] | Ref |
|------------------------------|------------------|-----------------|----------------------|------------------|------------|----------------|----------|-----------|-------|-------|-----------------|---------------|--------|-----|
| glycine, urea                | refined compound | water           | 800 W, 3 min         | microwave        | no         | no             | yes      | 3.2       | 0.396 | 0.419 | 320             | 380           | 13     | 1   |
| mulberry                     | raw material     | water           | 200 °C, 6 h          | hydrothermal     | yes        | no             | yes      | 3         | 0.058 | 0.330 | 320             | 390           | -      | 2   |
| L-ascorbic acid, β-alanine   | refined compound | water           | 180 °C, 1 h          | microwave        | no         | yes            | yes      | -         | 0.054 | 0.332 | 325             | 401           | 14     | 3   |
| <i>Borassus flabellifer</i>  | raw material     | air             | 300 °C, 2 h          | dry heating      | yes        | no             | no       | 5.1       | -     | -     | 320             | 403           | 13.97  | 4   |
| <i>Abelmoschus manihot</i>   | raw material     | water           | 220 °C, 4 h          | hydrothermal     | yes        | yes            | no       | 9         | 0.251 | 0.072 | 330             | 410           | 30.8   | 5   |
| <i>Osmanthus fragrans</i>    | raw material     | water           | 240 °C, 5 h          | hydrothermal     | yes        | yes            | yes      | 2.23      | 0.041 | 0.376 | 340             | 411           | 18.53  | 6   |
| citric acid, L-phenylalanine | refined compound | water           | 200 °C, 8 h          | hydrothermal     | yes        | no             | yes      | 11.9      | 0.136 | 0.355 | 350             | 413           | 65     | 7   |
| celery, L-glutathione        | hybrid           | water           | 200 °C, 4 h          | hydrothermal     | yes        | no             | no       | 2.08      | -     | -     | 340             | 415           | 53     | 8   |
| <i>Tamarindus indica</i>     | raw material     | water           | 210 °C, 5 h          | hydrothermal     | no         | yes            | yes      | 3.4       | 0.278 | 0.679 | 320             | 417           | 46.6   | 9   |
| scallion                     | raw material     | water           | 180 °C, 12 h         | hydrothermal     | no         | yes            | no       | 3.5       | 0.123 | 0.268 | 320             | 418           | 3.2    | 10  |
| bamboo                       | raw material     | air             | 300 °C, 3 h          | dry heating      | yes        | no             | no       | 11        | 0.062 | 1.002 | 313             | 419           | 5.18   | 11  |
| rose-heart radish            | raw material     | water           | 180 °C, 3 h          | hydrothermal     | yes        | yes            | yes      | 3.6       | 0.130 | 0.429 | 330             | 420           | 13.6   | 12  |
| <i>Eleusine coracana</i>     | raw material     | air             | 300 °C, 3 h          | dry heating      | yes        | no             | no       | 5.4       | -     | -     | 340             | 425           | -      | 13  |
| strawberry                   | raw material     | water           | 180 °C, 12 h         | hydrothermal     | yes        | yes            | no       | 5.2       | 0.102 | 0.354 | 344             | 427           | 6.3    | 14  |
| walnut                       | raw material     | walnut oil      | 220 °C, 24 h         | solvothermal     | yes        | yes            | no       | 12.3      | 0.052 | 1.117 | 360             | 430           | 14.5   | 15  |
| cherry tomato                | raw material     | water           | 180 °C, 6 h          | hydrothermal     | yes        | yes            | yes      | 7         | -     | -     | 340             | 430           | 9.7    | 16  |
| citric acid, glutathione     | refined compound | water           | 200 °C, 4 h          | hydrothermal     | no         | yes            | yes      | 6.1       | 0.202 | 0.261 | 340             | 432           | 75     | 17  |
| tulsi                        | raw material     | water           | 200 °C, 4 h          | hydrothermal     | yes        | no             | no       | 5         | 0.100 | 0.886 | 360             | 435           | 3.06   | 18  |
| lotus                        | raw material     | water           | 800 W, 6 min         | microwave        | yes        | yes            | yes      | 9.41      | 0.085 | 0.533 | 360             | 435           | 19     | 19  |
| ginkgo                       | raw material     | water           | 200 °C, 10 h         | hydrothermal     | yes        | yes            | yes      | 3         | 0.059 | 0.353 | 350             | 436           | 22.8   | 20  |
| <i>Prosopis juliflora</i>    | raw material     | air             | 200 °C, 1 h          | dry heating      | no         | yes            | no       | 5.8       | -     | -     | 350             | 437           | 4.9    | 21  |
| peanut                       | raw material     | air             | 250 °C, 2 h          | dry heating      | yes        | no             | no       | 1.62      | 0.040 | 0.494 | 320             | 440           | 9.91   | 22  |
| citric acid, L-arginine      | refined compound | water           | 200 °C, 8 h          | hydrothermal     | no         | no             | yes      | 2.7       | 0.108 | 0.172 | 350             | 440           | 38.8   | 23  |
| <i>Bauhinia</i>              | hybrid           | ethanol/water   | 1000 W, 10 min       | microwave        | no         | yes            | yes      | 3.4       | -     | -     | 355             | 442           | 27     | 24  |
| willow                       | raw material     | water           | 200 °C, 3 h          | hydrothermal     | no         | yes            | yes      | 1.6       | 0.430 | 0.388 | 360             | 444           | 6      | 25  |
| pomelo                       | raw material     | water           | 200 °C, 3 h          | hydrothermal     | no         | yes            | no       | 2.9       | 0.057 | 0.349 | 365             | 444           | 6.9    | 26  |
| folic acid                   | refined compound | water           | 180 °C, 3 h          | hydrothermal     | no         | yes            | no       | 2.8       | -     | -     | 380             | 445           | 31.59  | 27  |
| pepper                       | raw material     | water           | 180 °C, 5 h          | hydrothermal     | no         | yes            | yes      | 4.6       | -     | -     | 360             | 450           | 19.3   | 28  |
| <i>Eleocharis dulcis</i>     | raw material     | water           | 120 °C, 5 h          | hydrothermal     | yes        | yes            | yes      | 3         | 0.050 | 0.326 | 380             | 458           | 11.2   | 29  |
| <i>Azadirachta indica</i>    | raw material     | water           | 150 °C, 4 h          | hydrothermal     | no         | yes            | yes      | 3.2       | 0.088 | 0.120 | 340             | 467           | 27.2   | 30  |
| potato                       | raw material     | water           | 220 °C, 3 h          | hydrothermal     | no         | yes            | no       | 11        | -     | -     | 400             | 470           | -      | 31  |
| black pepper                 | raw material     | water           | 200 °C, 12 h         | hydrothermal     | yes        | no             | yes      | 3.5       | -     | -     | 390             | 489           | 43.6   | 32  |
| maize                        | raw material     | water           | 160 °C, 10 h         | hydrothermal     | yes        | no             | yes      | 5.2       | 0.016 | 0.346 | 420             | 500           | 7.6    | 33  |
| <i>Ocimum sanctum</i>        | raw material     | water           | 180 °C, 4 h          | hydrothermal     | yes        | no             | yes      | 2.4       | 0.180 | 0.347 | 450             | 500           | 9.3    | 34  |
| <i>Allium fistulosum</i>     | raw material     | water           | 220 °C, 3 h          | hydrothermal     | no         | yes            | yes      | 4.22      | 0.367 | 0.378 | 412             | 503           | 10.48  | 35  |
| watermelon                   | raw material     | air             | 220 °C, 2 h          | dry heating      | yes        | yes            | yes      | 2         | 0.015 | 0.308 | 470             | 537           | 7.1    | 36  |

QY = Quantum yield

## References

1. L. Liu, Z. Mi, Q. Hu, C. Li, X. Li and F. Feng, *Anal. Methods*, 2019, **11**, 353-358.
2. Y. Shao, C. Zhu, Z. Fu, K. Lin, Y. Wang, Y. Chang, L. Han, H. Yu and F. Tian, *J. Nanoparticle Res.*, 2020, **22**, 229.
3. T. N. J. I. Edison, R. Atchudan, M. G. Sethuraman, J.-J. Shim and Y. R. Lee, *J. Photochem. Photobiol., B*, 2016, **161**, 154-161.
4. N. Murugan and A. K. Sundramoorthy, *New J. Chem.*, 2018, **42**, 13297-13307.
5. Y. Wan, M. Wang, K. Zhang, Q. Fu, M. Gao, L. Wang, Z. Xia and D. Gao, *Microchem. J.*, 2019, **148**, 385-396.
6. M. Wang, Y. Wan, K. Zhang, Q. Fu, L. Wang, J. Zeng, Z. Xia and D. Gao, *Anal. Bioanal. Chem.*, 2019, **411**, 2715-2727.
7. S. Chahal, N. Yousefi and N. Tufenkji, *ACS Sustainable Chem. Eng.*, 2020, **8**, 5566-5575.
8. Y. Qu, L. Yu, B. Zhu, F. Chai and Z. Su, *New J. Chem.*, 2020, **44**, 1500-1507.
9. D. Bano, V. Kumar, V. K. Singh and S. H. Hasan, *New J. Chem.*, 2018, **42**, 5814-5821.
10. Z. Zhang, B. Hu, Q. Zhuang, Y. Wang, X. Luo, Y. Xie and D. Zhou, *Analytical Letters*, 2020, **53**, 1704-1718.
11. X. Yang, D. Wang, N. Luo, M. Feng, X. Peng and X. Liao, *Spectrochim. Acta, Part A*, 2020, **239**, 118462.
12. W. Liu, H. Diao, H. Chang, H. Wang, T. Li and W. Wei, *Sens. Actuators, B*, 2017, **241**, 190-198.
13. N. Murugan, M. Prakash, M. Jayakumar, A. Sundaramurthy and A. K. Sundramoorthy, *Appl. Surf. Sci.*, 2019, **476**, 468-480.
14. H. Huang, J.-J. Lv, D.-L. Zhou, N. Bao, Y. Xu, A.-J. Wang and J.-J. Feng, *RSC Adv.*, 2013, **3**, 21691-21696.
15. E. Arkan, A. Barati, M. Rahmanpanah, L. Hosseinzadeh, S. Moradi and M. Hajialyani, *Adv. Pharm. Bull.*, 2018, **8**, 149-155.
16. Z. Lai, X. Guo, Z. Cheng, G. Ruan and F. Du, *ChemistrySelect*, 2020, **5**, 1956-1960.
17. P. Zuo, J. Liu, H. Guo, C. Wang, H. Liu, Z. Zhang and Q. Liu, *Anal. Bioanal. Chem.*, 2019, **411**, 1647-1657.
18. S. Bhatt, M. Bhatt, A. Kumar, G. Vyas, T. Gajaria and P. Paul, *Colloids Surf., B*, 2018, **167**, 126-133.
19. D. Gu, S. Shang, Q. Yu and J. Shen, *Appl. Surf. Sci.*, 2016, **390**, 38-42.
20. X. Jiang, D. Qin, G. Mo, J. Feng, C. Yu, W. Mo and B. Deng, *J. Pharm. Biomed. Anal.*, 2019, **164**, 514-519.
21. N. Pourreza and M. Ghomi, *Mater. Sci. Eng., C*, 2019, **98**, 887-896.
22. M. Xue, Z. Zhan, M. Zou, L. Zhang and S. Zhao, *New J. Chem.*, 2016, **40**, 1698-1703.
23. Z. Zhang, J. Chen, Y. Duan, W. Liu, D. Li, Z. Yan and K. Yang, *Lumin.*, 2018, **33**, 318-325.
24. Q. Huang, Q. Li, Y. Chen, L. Tong, X. Lin, J. Zhu and Q. Tong, *Sens. Actuators, B*, 2018, **276**, 82-88.
25. X. Qin, W. Lu, A. M. Asiri, A. O. Al-Youbi and X. Sun, *Catal. Sci. Technol.*, 2013, **3**, 1027-1035.
26. W. Lu, X. Qin, S. Liu, G. Chang, Y. Zhang, Y. Luo, A. M. Asiri, A. O. Al-Youbi and X. Sun, *Anal. Chem.*, 2012, **84**, 5351-5357.
27. Y. Zheng, D. Yang, X. Wu, H. Yan, Y. Zhao, B. Feng, K. Duan, J. Weng and J. Wang, *RSC Adv.*, 2015, **5**, 90245-90254.
28. B. Yin, J. Deng, X. Peng, Q. Long, J. Zhao, Q. Lu, Q. Chen, H. Li, H. Tang, Y. Zhang and S. Yao, *Anal.*, 2013, **138**, 6551-6557.

29. R. Bao, Z. Chen, Z. Zhao, X. Sun, J. Zhang, L. Hou and C. Yuan, *Nanomater.*, 2018, **8**, 386.
30. P. K. Yadav, V. K. Singh, S. Chandra, D. Bano, V. Kumar, M. Talat and S. H. Hasan, *ACS Biomater. Sci. Eng.*, 2019, **5**, 623-632.
31. H. M. Ahmed, M. Ghali, W. K. Zahra and M. Ayad, *Materials Today: Proceedings*, 2020, **33**, 1845-1848.
32. N. Vasimalai, V. Vilas-Boas, J. Gallo, M. d. F. Cerqueira, M. Menéndez-Miranda, J. M. Costa-Fernández, L. Diéguez, B. Espiña and M. T. Fernández-Argüelles, *Beilstein J. Nanotechnol.*, 2018, **9**, 530-544.
33. J. Shi, G. Ni, J. Tu, X. Jin and J. Peng, *J. Nanoparticle Res.*, 2017, **19**, 209.
34. A. Kumar, A. R. Chowdhuri, D. Laha, T. K. Mahto, P. Karmakar and S. K. Sahu, *Sens. Actuators, B*, 2017, **242**, 679-686.
35. Z. Wei, B. Wang, Y. Liu, Z. Liu, H. Zhang, S. Zhang, J. Chang and S. Lu, *New J. Chem.*, 2019, **43**, 718-723.
36. J. Zhou, Z. Sheng, H. Han, M. Zou and C. Li, *Mater. Lett.*, 2012, **66**, 222-224.
